# Supplementary material for: Marginal Bone Level and Clinical Parameter Analysis Comparing External Hexagon and Morse Taper Implants: A Systematic Review and Meta-Analysis
Source: MDPI journal article supplement (doi:10.3390/diagnostics13091587), 2023-04-28
Supplement: s1 [file s1]

**Table S1.** Search strategy carried out and filters applied.

|                    |                                                                                                                                                                           |
|--------------------|---------------------------------------------------------------------------------------------------------------------------------------------------------------------------|
|                    | P – patients rehabilitated with dental implants                                                                                                                           |
| #1                 | ("Dental Implants" [MeSH Terms]) OR (Dental Implant* [Supplementary Concept]) OR ("Implant Placement") OR ("Implant")                                                     |
| #2                 | I – implant with external hexagon connection<br>("External Hexagon") OR ("External Connection")                                                                           |
| #3                 | C – implant with morse taper connection<br>("Internal Connection") OR ("Morse Taper") OR ("Morse")                                                                        |
| #4                 | O – clinical findings (MBL, BoP, inflammation, radiographic bone loss)<br>("Crestal Bone") OR ("Marginal Bone") OR ("Bone Loss"), ("Bleeding") OR ("Bleeding on Probing") |
| Search Combination | (#1 AND #2 AND #3 AND #4)                                                                                                                                                 |
| Filters            | English, Humans                                                                                                                                                           |
